# Supplementary material
Source: PubMed Central journal article supplement (PMC3552263)
Supplement: mmc1.pdf [file mmc1.pdf]

# Integrating mitochondrial energetics, redox and ROS metabolic networks: A two-compartment model\*

---

**Jackelyn M. Kembro<sup>\*</sup>, Miguel A. Aon<sup>\*</sup>, Raimond L. Winslow<sup>†</sup>, Brian O'Rourke<sup>\*</sup> and Sonia  
Cortassa<sup>\*,†</sup>**

<sup>\*</sup>Division of Cardiology, and <sup>†</sup>Institute for Computational Medicine  
Johns Hopkins University School of Medicine, Baltimore MD 21205

**Supporting Material**

## Section S1. Redox potential and Redox environment

The Nernst equation was used to estimate the redox potential of each redox couple. The Nernst equation relates the change in free energy of the transfer of electrons to the voltage of an electrochemical cell, and can be expressed as:

$$\Delta E = \Delta E^\circ - \frac{RT}{nF} \ln Q \quad (\text{S1})$$

where  $n$  is the number of electrons exchanged in the chemical process,  $F$  is the Faraday constant, and  $\Delta E^\circ$  is the electromotive force under standard conditions, that is, the difference in the standard reduction potentials of the two half-cells involved in the process. The superscript  $^\circ$  implies the thermodynamic standard state.  $Q$  stands for the ratio of the concentration of products over the concentration of substrates of the redox reaction. When  $\Delta E$  is zero, thus  $\Delta G$  is zero, there is no net electron flow. Since, pH in the mitochondrial is not 7, Eq. 2 must be corrected for pH (Eq. 3) (for further explanation refer to (1)). The Nernst equation for 37°C (310°K), using 2.303 as the conversion factor for  $\ln$  into  $\log_{10}$  is:

$$E = E^\circ + ((pH - 7) * (-61.51\text{mV})) - \frac{61.51\text{mV}}{n} \log \frac{[\text{Red}_1]}{[\text{Ox}_1]} \quad (\text{S2})$$

The standard redox potentials used were -320 mV NADH/NAD<sup>+</sup>, -324 mV for NADPH/NADP<sup>+</sup> ( $E^\circ = -324$ ) mV, -292 mV for Trx(SH)<sub>2</sub>/TrxSS, and -240 mV for (2 GSH)/GSSG.

The **redox environment** was calculated from the summation of the products of the reduction potential and reducing capacity of the linked redox couples present in the system (1):

$$\text{Redox environment} = \sum_{i=1}^{n(\text{couple})} E_i [\text{reduced species}]_i \quad (\text{S3})$$

being  $E_i$  is the half-cell reduction potential (Nernst potential, Eq. 3) for a given redox pair and  $[\text{reduced species}]_i$  is the concentration of the reduced species in that redox pair (conceptually developed under Results section “*Steady state behavior of the redox environment*”).

## Section S2

### B

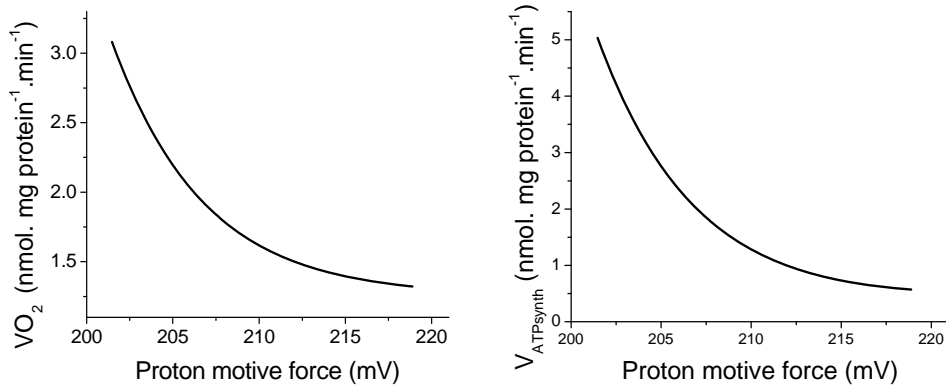

**D**

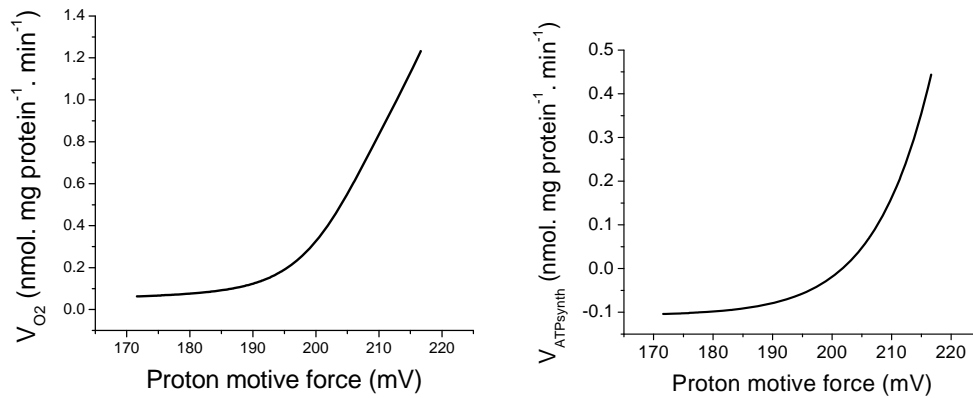

**Fig. S1. Steady state respiratory flux and ATP synthase activity**

Steady state A) respiration from both complex I and II ( $VO_2$ ) and C) ATP synthase rate *versus* proton motive force, obtained by departing from a state 4 respiratory state ( $[ADP]_i = 0.01$  mM) and increasing the extra-mitochondrial ADP concentration towards a state 3 respiratory state ( $[ADP]_i = 1$  mM). (C) and (D) Steady state flux of respiration and ATP synthase rate, respectively, as related with proton motive force, obtained by departing from a de-energized steady state and increasing the parameter  $[AcCoA]$  from  $1 \times 10^{-6}$  to 1 mM, at a fixed GLU concentration of  $1.3 \times 10^{-4}$  mM, and  $[ADP]_i = 0.01$  mM.

### Section S3. Oscillatory dynamics in the ME-R model

Stability analysis of the model was performed as a function of the fraction of electrons channeled from the respiratory chain into  $O_2^-$  production versus respiration at different levels of matrix superoxide dismutase (MnSOD) activity. The model simulates the experimentally determined oscillatory period,  $\Delta\Psi_m/NADH$  phase relationship, and the typical waveform exhibited by relaxation oscillators (Fig. S2) (2, 3).

The underlying oscillatory mechanism involves ROS imbalance determined by the interplay between ROS production and scavenging (SOD) as the main trigger. During an oscillatory cycle,

accumulation of  $O_2^-$  in the mitochondrial matrix augments the leak through the inner membrane anion channel (IMAC). When the level of extra-matrix  $O_2^-$  (dashed line in Fig. S2) exceeds a threshold it triggers the opening of IMAC. As a result,  $\Delta\Psi_m$  depolarizes concomitant with oxidation of the NADH pool (Fig. S2). The cycle terminates when  $O_2^-$  drops below the threshold, subsequent to scavenger pathway activation and decreased  $O_2^-$  efflux. The ability of the ME-R model to simulate the mitochondrial oscillations is remarkable, given that the levels of  $O_2^-$  attained during an oscillatory cycle are much lower than in previous simulations (3). The bi-compartmental nature of the new model which accounts for both ROS scavenging in the matrix and extra-matrix space (see Fig. 1), also testifies to the robustness of the oscillatory mechanism.

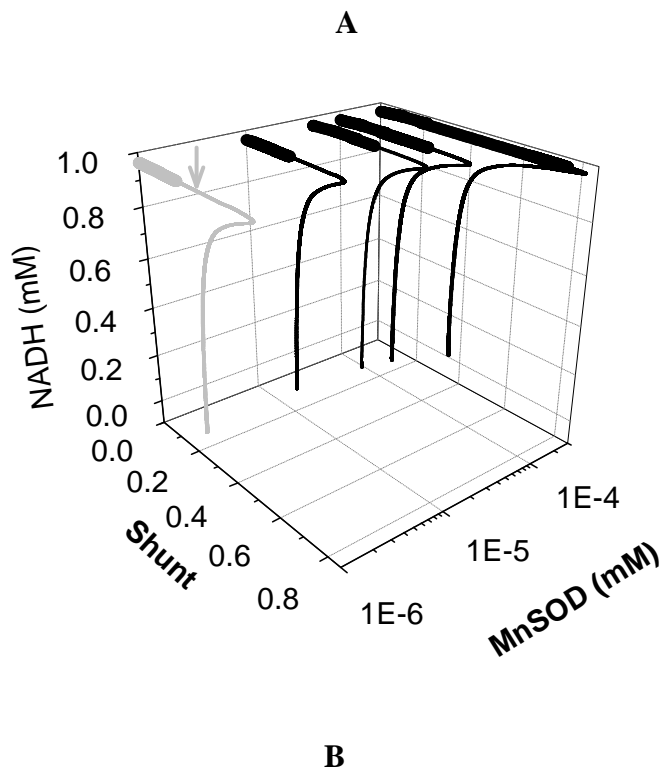

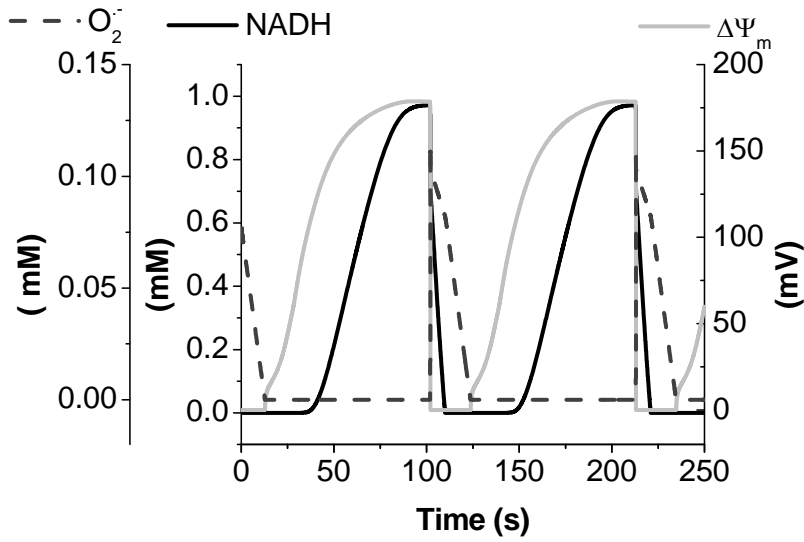

**Fig. S2. Simulation of sustained mitochondrial oscillations under oxidative stress**

A) 3D representation of bifurcation diagrams of NADH as a function of the rate of ROS production by the respiratory chain (shunt) and ROS scavenging given by various levels of MnSOD ( $Et_{MnSOD}$ ). Thick lines indicate domains of stable steady-state behavior, whereas thin lines denote either unstable or oscillatory states. The stable oscillatory domain in the upper branch widens as MnSOD concentration decreases. Unstable regions are characterized by, at least, one pair of complex conjugate eigenvalues with positive real parts. From left to right, the MnSOD concentration was (in mM):  $1 \times 10^{-6}$ ,  $1 \times 10^{-5}$ ,  $5 \times 10^{-5}$ ,  $1 \times 10^{-4}$  and  $3 \times 10^{-4}$ . A Cu,ZnSOD concentration of  $3.2 \times 10^{-4}$  mM was used in all (4) but one of the curves where a concentration of  $4 \times 10^{-4}$  was utilized (grey trace). Notice that the appearance of sustained mitochondrial oscillations is nonlinearly dependent on both the rate of ROS production by the respiratory chain and scavenging of  $O_2^-$  by MnSOD and Cu, ZnSOD.

B) Simulation of sustained mitochondrial oscillations with a period of  $\sim 100$ s. Parameters used were Shunt= 0.25;  $Et_{MnSOD}=1 \times 10^{-6}$ ;  $Et_{CuZnSOD}=4 \times 10^{-4}$  (indicated with a grey arrow in panel A). Simulations were performed with following parameter set:  $\rho^{F1} = 0.02$ ,  $\rho^{res} = 0.018$ ,  $\rho^{res(SDH)} = 0.007$ ,  $[Pi]_i = 0.5$ ,  $[AcCoA] = 0.01$ ,  $[GLU] = 10$ ,  $g_H = 3 \times 10^{-8}$ ,  $k_{cat}^{CS} = 7.84 \times 10^{-6}$ ,  $k_f^{ACO} = 3.896 \times 10^{-6}$ ,  $k_{cat}^{IDH} = 2.64 \times 10^{-2}$ ,  $k_{cat}^{KDGH} = 8.84 \times 10^{-4}$ ,  $k_f^{SL} = 1.40 \times 10^{-3}$ ,  $k_f^{FH} = 4.15 \times 10^{-4}$ ,  $k_{cat}^{MDH} = 6.21 \times 10^{-3}$ ,  $k_f^{AAT} = 1.07 \times 10^{-3}$ ,  $C_{PiC} = 1.69$ ,  $V_{nai} = 5$ ,  $V_{max}^{uni} = 2.46 \times 10^{-3}$ ,  $V_{max}^{NaCa} = 9.33 \times 10^{-5}$ ,  $V_{max}^{ANT} = 0.4354$ ,  $E_T^{Pvx3m} = 8.7 \times 10^{-5}$ ,  $E_T^{PvxRl} = 8.7 \times 10^{-5}$ ,  $E_T^{Pvx3m} = 8 \times 10^{-3}$ ,  $E_T^{PvxRl} = 5 \times 10^{-3}$ ,  $E_T^{GPXm} = 5 \times 10^{-6}$ ,  $E_T^{GPXI} = 0.001$ ,  $E_T^{GRm} = 1.6 \times 10^{-4}$ ,  $E_T^{GRl} = 1.6 \times 10^{-4}$ ,  $E_T^{AAT} = 1 \times 10^{-6}$ .

## Section S4.

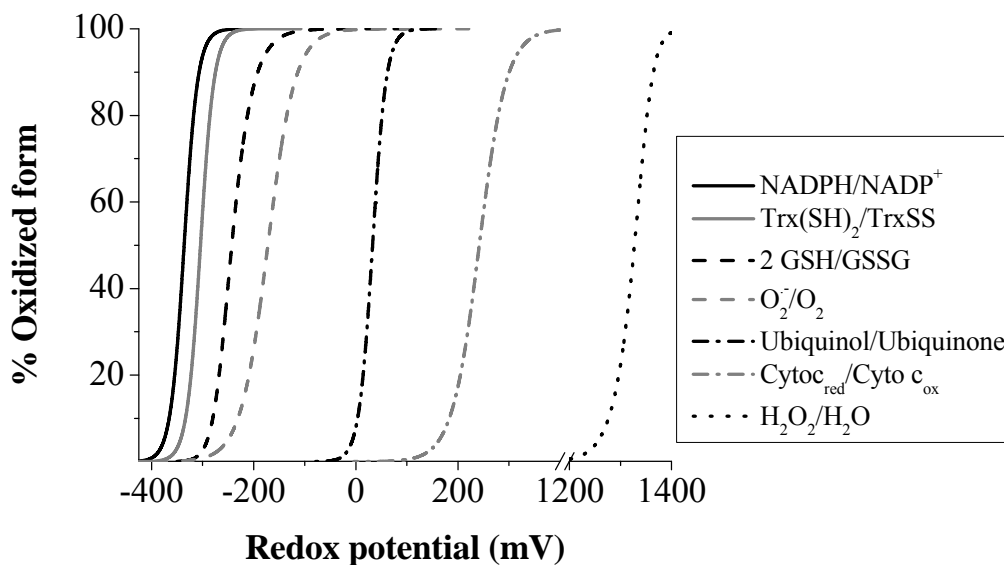

**Fig. S3. Reduction potential of main mitochondrial redox couples**

From this representation it can be clearly seen that the NADP<sup>+</sup>/NADPH couple is the provider of reducing equivalents needed by GSH/Trx scavenging systems to reduce H<sub>2</sub>O<sub>2</sub> to water, in a thermodynamically highly favorable reaction. Percent oxidized form = ([oxidized]/total)\*100. Considering the basic redox reaction: **Red<sub>1</sub>** + Ox<sub>2</sub> ↔ **Ox<sub>1</sub>** + Red<sub>2</sub>, for each redox couple Red<sub>1</sub> varied from 1×10<sup>-4</sup> to 1 mM while Ox<sub>1</sub> was estimated as 1 - Red<sub>1</sub>. The standard redox potentials used in this graph were -324 mV for NADPH/NADP<sup>+</sup>; -292 mV for Trx(SH)<sub>2</sub>/TrxSS; -240 mV for 2 GSH/GSSG; -160 mV for O<sub>2</sub><sup>-</sup>/O<sub>2</sub>; 45 mV for Ubiquinol/Ubiquinone; 254 mV for Cytochrome c (Fe<sup>3+</sup>)/ Cytochrome c (Fe<sup>2+</sup>) and 1349 mV for H<sub>2</sub>O<sub>2</sub> (1, 5, 6). Concentrations were varied between 1×10<sup>-4</sup> and 1. Conditions correspond to pH 7.2 and 37°C.

**Section S5. Relationship between NADH concentration and membrane potential (ΔΨ<sub>m</sub>) at different level of substrates**

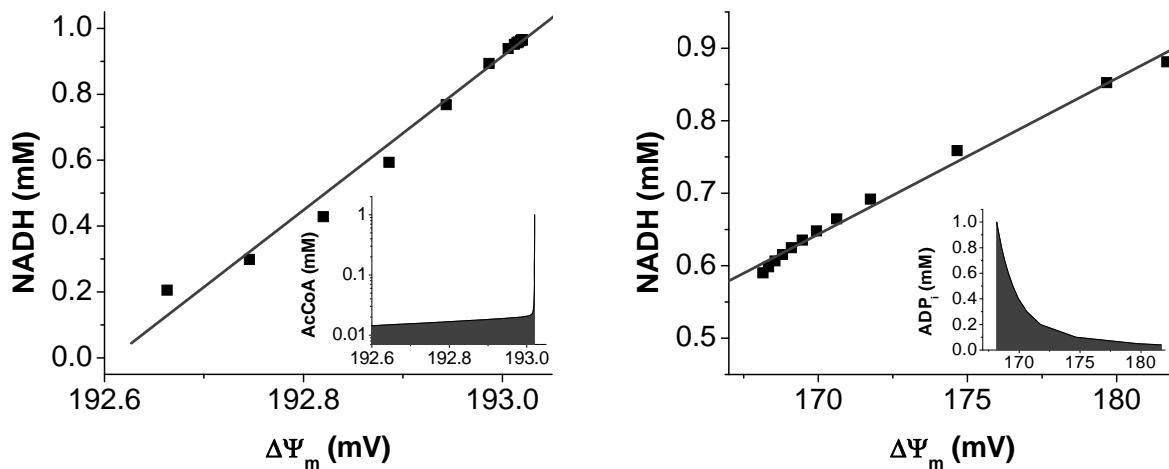

**Fig. S4. Lineal relationship between NADH and  $\Delta\Psi_m$  at different concentrations of Acetyl CoA (AcCoA) and ADP**

A) Steady state values of NADH and  $\Delta\Psi_m$  were obtained at increasing concentrations of AcCoA (inset). B) Steady state values of NADH and  $\Delta\Psi_m$  were obtained at increasing concentrations of ADP<sub>i</sub> (inset). From this representation it can be clearly seen that increasing concentrations of extra-matrix ADP (simulating state 4 to state 3 transition) results in decrease of both NADH and  $\Delta\Psi_m$ , while a lineal relationship is maintained between these variables. The parameter set used is the same as in the simulations presented in the main text.

## Section S6

**Table S1. System of differential and algebraic equations used in the ME-R model**

|                                                                                                                                   |       |
|-----------------------------------------------------------------------------------------------------------------------------------|-------|
| $\frac{d[Ca^{2+}]_m}{dt} = \delta_{Ca} (V_{uni} - V_{NaCa})$                                                                      | (S4)  |
| $\frac{d[ADP]_m}{dt} = V_{ANT} - V_{ATPase} - V_{SL}$                                                                             | (S5)  |
| $\frac{d\Delta\Psi_m}{dt} = \frac{V_{He} + V_{He(SDH)} - V_{Hu} - V_{ANT} - V_{Hleak} - V_{NaCa} - V_{uni} - V_{IMAC}}{C_{mito}}$ | (S6)  |
| $\frac{d[NADH]_m}{dt} = V_{O_2} + V_{IDH} + V_{KGDH} + V_{MDH} - V_{THD}$                                                         | (S7)  |
| $\frac{d[H^+]_m}{dt} = \delta_M (-V_{He} - V_{He(SDH)} + V_{Hu} + V_{NaH} + V_{PiC} + V_{Hleak})$                                 | (S8)  |
| $\frac{d[Pi]_m}{dt} = -V_{ATPase} + V_{PiC} - V_{SL}$                                                                             | (S9)  |
| $\frac{d[ISOC]}{dt} = V_{ACO} - V_{IDH} - V_{IDH\_NADP}$                                                                          | (S10) |
| $\frac{d[\alpha KG]}{dt} = V_{IDH} + V_{IDH\_NADP} - V_{KGDH} + V_{ATT}$                                                          | (S11) |
| $\frac{d[SCoA]}{dt} = V_{KGDH} - V_{SL}$                                                                                          | (S12) |
| $\frac{d[Suc]}{dt} = V_{SL} - V_{O_2SDH}$                                                                                         | (S13) |
| $\frac{d[FUM]}{dt} = V_{O_2SDH} - V_{FH}$                                                                                         | (S14) |
| $\frac{d[MAL]}{dt} = V_{FH} - V_{MDH}$                                                                                            | (S15) |
| $\frac{d[OAA]}{dt} = V_{MDH} - V_{CS} - V_{AAT}$                                                                                  | (S16) |
| $\frac{d[NADPH]_m}{dt} = V_{IDH\_NADP} + V_{THD} - V_{GRm} - V_{TxRm}$                                                            | (S17) |



|                                                                                                         |       |
|---------------------------------------------------------------------------------------------------------|-------|
| $\frac{d[O_2^{\bullet-}]_m}{dt} = shunt(V_{O_2} + V_{O_2SDH}) - V_{MnSOD} - V_{ROS}^{Tr}$               | (S18) |
| $\frac{d[O_2^{\bullet-}]_i}{dt} = \frac{v_m}{v_i} V_{ROS}^{Tr} - V_{CuZnSOD}$                           | (S19) |
| $\frac{d[H_2O_2]_m}{dt} = V_{MnSOD} - V_{difH_2O_2} - V_{GPXm} - V_{TxPXm}$                             | (S20) |
| $\frac{d[H_2O_2]_i}{dt} = V_{CuZnSOD} + \frac{v_m}{v_i} V_{difH_2O_2} - V_{GPXi} - V_{TxPXi} - V_{CAT}$ | (S21) |
| $\frac{d[GSH]_m}{dt} = V_{GRm} - V_{GPXm} - V_{GRXm} + V_{GST} - V_{PSSGm}$                             | (S22) |
| $\frac{d[GSH]_i}{dt} = V_{GRi} - V_{GPXi} - V_{GRXi} + \frac{v_m}{v_i} V_{GST} - V_{PSSGi}$             | (S23) |
| $\frac{d[GSSG]_m}{dt} = 0.5(V_{GPXm} - V_{GRm}) + V_{GRXm}$                                             | (S24) |
| $\frac{d[TxR]_m}{dt} = V_{TxRm} - V_{TxPXm}$                                                            | (S25) |
| $\frac{d[TxR]_i}{dt} = V_{TxRi} - V_{TxPXi}$                                                            | (S26) |
| $\frac{d[PSSG]_m}{dt} = V_{PSSGm} - V_{GRXm}$                                                           | (S27) |
| $\frac{d[PSSG]_i}{dt} = V_{PSSGi} - V_{GRXi}$                                                           | (S28) |

The values of the ratio  $v_m/v_i$  used, representing the volume of the mitochondrial matrix ( $v_m$ ) over the extra-matrix compartment ( $v_i$ ), were 0.00256 to represent the cuvette situation or 0.25 for the intracellular condition.

## Section S7. Computational modeling of Reactive Oxygen Species scavenging systems

The upgraded two-compartment computational model of mitochondrial energetics-redox (ME-R) includes: (i) a complete array of antioxidant defenses in two compartments: mitochondrial matrix and extra-matrix (e.g. intermembrane space, cytoplasm); and (ii) two of the three main NADPH providers in mitochondria: NADP<sup>+</sup>-dependent isocitrate dehydrogenase (IDH2) in the TCA cycle, and transhydrogenase (THD). In this section we will provide a detailed description of the antioxidant defenses and mitochondrial NADPH handling.

### 7.1. Modeling superoxide dismutase

$$V_{\text{MnSOD}} = \frac{2 k_{\text{SOD}}^1 k_{\text{SOD}}^5 \left( k_{\text{SOD}}^1 + k_{\text{SOD}}^3 \left( 1 + \frac{[\text{H}_2\text{O}_2]_m}{K_i^{\text{H}_2\text{O}_2}} \right) \right) E_{\text{MnSOD}}^T [\text{O}_2^{\bullet-}]_m}{k_{\text{SOD}}^5 \left( 2 k_{\text{SOD}}^1 + k_{\text{SOD}}^3 \left( 1 + \frac{[\text{H}_2\text{O}_2]_m}{K_i^{\text{H}_2\text{O}_2}} \right) \right) + [\text{O}_2^{\bullet-}]_m k_{\text{SOD}}^1 k_{\text{SOD}}^3 \left( 1 + \frac{[\text{H}_2\text{O}_2]_m}{K_i^{\text{H}_2\text{O}_2}} \right)} \quad (\text{S29})$$

$$V_{\text{CuZnSOD}} = \frac{2 k_{\text{SOD}}^1 k_{\text{SOD}}^5 \left( k_{\text{SOD}}^1 + k_{\text{SOD}}^3 \left( 1 + \frac{[\text{H}_2\text{O}_2]_i}{K_i^{\text{H}_2\text{O}_2}} \right) \right) E_{\text{CuZnSOD}}^T [\text{O}_2^{\bullet-}]_i}{k_{\text{SOD}}^5 \left( 2 k_{\text{SOD}}^1 + k_{\text{SOD}}^3 \left( 1 + \frac{[\text{H}_2\text{O}_2]_i}{K_i^{\text{H}_2\text{O}_2}} \right) \right) + [\text{O}_2^{\bullet-}]_i k_{\text{SOD}}^1 k_{\text{SOD}}^3 \left( 1 + \frac{[\text{H}_2\text{O}_2]_i}{K_i^{\text{H}_2\text{O}_2}} \right)} \quad (\text{S30})$$

### 7.2. H<sub>2</sub>O<sub>2</sub> transport

H<sub>2</sub>O<sub>2</sub> can diffuse freely between the two compartments, following the equation:

$$V_{\text{diff}_{\text{H}_2\text{O}_2}} = C_{\text{diff}_{\text{H}_2\text{O}_2}} ([\text{H}_2\text{O}_2]_m - [\text{H}_2\text{O}_2]_i) \quad (\text{S31})$$

### 7.3. Glutathione and glutaredoxin systems

The glutathione system was present in both mitochondrial matrix and extra-matrix compartments and expressed as a system of equations comprising glutathione peroxidase ( $V_{\text{GPX}}$ ) and reductase ( $V_{\text{GR}}$ ) activities. The rate expressions for  $V_{\text{GPX}}$  and  $V_{\text{GR}}$  used in the model were formulated as described in our mitochondrial model of ROS metabolism (3).

$$V_{\text{GPX}_m} = \frac{E_T^{\text{GPX}_m} [\text{H}_2\text{O}_2]_m [\text{GSH}]_m}{\Phi_1 [\text{GSH}]_m + \Phi_2 [\text{H}_2\text{O}_2]_m} \quad (\text{S32})$$

$$V_{\text{GPX}_i} = \frac{E_T^{\text{GPX}_i} [\text{H}_2\text{O}_2]_i [\text{GSH}]_i}{\Phi_1 [\text{GSH}]_i + \Phi_2 [\text{H}_2\text{O}_2]_i} \quad (\text{S33})$$

$$V_{GR_m} = \frac{k_{GR}^1 E_T^{GRm}}{1 + \frac{K_M^{GSSG}}{[GSSG]} + \frac{K_M^{NADPH}}{[NADPH]_m} + \frac{K_M^{GSSG}}{[GSSG]_m} \frac{K_M^{NADPH}}{[NADPH]_m}} \quad (S34)$$

$$V_{GR_i} = \frac{k_{GR}^1 E_T^{GRi}}{1 + \frac{K_M^{GSSG}}{V_{GSS}} + \frac{K_M^{NADPH}}{[NADPH]_i} + \frac{K_M^{GSSG}}{[GSSG]_i} \frac{K_M^{NADPH}}{[NADPH]_i}} \quad (S35)$$

The glutaredoxin system can then detoxify the glutathionylated proteins and uses GSH as cofactor (7, 8).

$$V_{GRX_m} = \frac{k_{grx_m} K_{eq}^{GRX} ([GSH]_m)^2 GrxT [PSSG]_m}{\left([GSSG]_m + K_{eq}^{GRX} ([GSH]_m)^2\right) \left(\frac{K_{eq}^{GRX} ([GSH]_m)^2 GrxT}{[GSSG]_m + K_{eq}^{GRX} ([GSH]_m)^2} + K_m^{Grx}\right) ([PSSG]_m + K_m^{PSSG})} \quad (S36)$$

$$V_{GRX_i} = \frac{k_{grx_i} K_{eq}^{GRX} ([GSH]_i)^2 GrxT [PSSG]_i}{\left(V_{GSS} + K_{eq}^{GRX} ([GSH]_i)^2\right) \left(\frac{K_{eq}^{GRX} ([GSH]_i)^2 GrxT}{[GSSG]_i + K_{eq}^{GRX} ([GSH]_i)^2} + K_m^{Grx}\right) ([PSSG]_i + K_m^{PSSG})} \quad (S37)$$

$$V_{PSSG_m} = \frac{k_{PSH}^1 E_T^{PSH} (PSSGT - [PSSG]_m)}{\left(1 + \frac{K_M^{GSH}}{[GSH]_m}\right) \left(1 + \frac{[H_2O_2]_m}{K_{act}^{H2O2}}\right)} \quad (S38)$$

$$V_{PSSG_i} = \frac{k_{PSH}^1 E_T^{PSH} (PSSGT - [PSSG]_i)}{\left(1 + \frac{K_M^{GSH}}{[GSH]_i}\right) \left(1 + \frac{[H_2O_2]_i}{K_{act}^{H2O2}}\right)} \quad (S39)$$

We have assumed that the total pool of glutathione,  $G_T$ , is conserved, as indicated by equation S40, and from there the GSSG concentration in the extra-matrix compartment can be estimated (Eq. S41).

$$G_T = G_T - [GSH]_m - [GSH]_i - 2[GSSG] - [PSSG]_m - [PSSG]_i - 2[GSSG]_i \quad (S40)$$

$$[GSSG]_i = 0.5 (G_T - [GSH]_m - [GSH]_i - 2[GSSG]_m - [PSSG]_m - [PSSG]_i) \quad (S41)$$

In addition we have included passive GSH transport ( $V_{GST}$ ) across the inner mitochondrial membrane.

$$V_{GST} = c_{GST} \frac{([GSH]_i - [GSH]_m)}{[GSH]_i + k_{0.5}^{GST}} \quad (S42)$$

#### 7.4. Thioredoxin system

The Trx system includes peroxiredoxin ( $V_{TPX}$ ) and thioredoxin reductase ( $V_{TRR}$ ) (9). The rate expression for  $V_{TPX}$  was derived on the basis of the experimental studies performed by (10), from which we also obtained the rate constants.  $V_{TRR}$  represents a Michaelis-Menten rate expression with two substrates (NADPH and Trx(SS)) with kinetic parameters derived from refs. (11) and (12).

$$V_{TPX_m} = \frac{E_T^{Prx3m} [H_2O_2]_m [TrxSH_2]_m}{\Phi_{1Prx} [TrxSH_2]_m + \Phi_{2Prx} [H_2O_2]_m} \quad (S43)$$

$$V_{TPX_i} = \frac{E_T^{Prxi} [H_2O_2]_i [TrxSH_2]_i}{\Phi_{1Prx} [TrxSH_2]_i + \Phi_{2Prx} [H_2O_2]_i} \quad (S44)$$

$$V_{TRR_m} = \frac{k_{TRR}^1 E_T^{TrxR2m}}{1 + \frac{K_M^{TrxSS}}{[TrxSS]_m} + \frac{K_{Mtrx}^{NADPH}}{[NADPH]_m} + \frac{K_M^{TrxSS}}{[TrxSS]_m} \frac{K_{Mtrx}^{NADPH}}{[NADPH]_m}} \quad (S45)$$

$$V_{TRR_i} = \frac{k_{TRR}^1 E_T^{TrxRi}}{1 + \frac{K_M^{TrxSS}}{[TrxSS]_i} + \frac{K_{Mtrx}^{NADPH}}{[NADPH]_i} + \frac{K_M^{TrxSS}}{[TrxSS]_i} \frac{K_{Mtrx}^{NADPH}}{[NADPH]_i}} \quad (S46)$$

$$[TrxSS]_m = TrxT_m - [TrxSH_2]_m \quad (S47)$$

$$[TrxSS]_i = TrxT_i - [TrxSH_2]_i \quad (S48)$$

#### 7.5. Extra-matrix Catalase

$$V_{CAT} = 2k_{CAT}^1 E_{CAT}^T [H_2O_2]_i e^{-fr[H_2O_2]_i} \quad (S49)$$

**Table S2. Parameter values used in the simulations: ROS production and scavenging**

| Symbol                         | Value                | Units                           | Description                                                 | Eq      | Reference |
|--------------------------------|----------------------|---------------------------------|-------------------------------------------------------------|---------|-----------|
| $k_{\text{SOD}}^1$             | $1.2 \times 10^3$    | $\text{mM}^{-1} \text{ms}^{-1}$ | Second-order rate constant of SOD                           | S29,S30 |           |
| $k_{\text{SOD}}^3$             | 24                   | $\text{mM}^{-1} \text{ms}^{-1}$ | Second-order rate constant of SOD                           | S29,S30 |           |
| $k_{\text{SOD}}^5$             | $2.4 \times 10^{-4}$ | $\text{ms}^{-1}$                | First-order rate constant of SOD                            | S29,S30 |           |
| $K_i^{\text{H}_2\text{O}_2}$   | 0.5                  | mM                              | Inhibition constant for $\text{H}_2\text{O}_2$              | S29,S30 | f         |
| $E_{\text{MnSOD}}^T$           | T. 1                 | mM                              | Mitochondrial matrix concentration of MnSOD                 | S29     | Adjusted  |
| $E_{\text{CuZnSOD}}^T$         | T. 1                 | mM                              | Concentration of Cu,ZnSOD                                   | S30     | Adjusted  |
| $c_{\text{diffH}_2\text{O}_2}$ | $2 \times 10^{-4}$   | $\text{ms}^{-1}$                | Diffusion constant for $\text{H}_2\text{O}_2$               | S31     | Adjusted  |
| $\Phi_1$                       | $5.0 \times 10^{-3}$ | mM ms                           | Constant for GPX activity                                   | S32,S33 | a         |
| $\Phi_2$                       | 0.75                 | mM ms                           | Constant for GPX activity                                   | S32,S33 | a         |
| $E_T^{\text{GPXm}}$            | T. 1                 | mM                              | Mitochondrial matrix concentration of GPX                   | S32     | Adjusted  |
| $E_T^{\text{GPXi}}$            | T. 1                 | mM                              | Extra-matrix concentration of GPX                           | S33     | Adjusted  |
| $k_{\text{GR}}^1$              | $2.5 \times 10^{-3}$ | $\text{ms}^{-1}$                | Catalytic constant of GR                                    | S34,S35 | a         |
| $E_T^{\text{GRm}}$             | T. 1                 | mM                              | Mitochondrial matrix concentration of GR                    | S34     | Adjusted  |
| $E_T^{\text{GRi}}$             | T. 1                 | mM                              | Extra-matrix concentration of GR                            | S35     | Adjusted  |
| $K_M^{\text{NADPH}}$           | 0.015                | mM                              | Michaelis constant for NADPH of GR                          | S34,S35 | a         |
| $K_M^{\text{GSSG}}$            | 0.06                 | mM                              | Michaelis constant for GSSG of GR                           | S34,S35 | a         |
| $[\text{NADPH}]_i$             | $7.5 \times 10^{-2}$ | mM                              | Extra-matrix NADPH concentration                            | S34,S35 |           |
| $G_T$                          | 6                    | mM                              | Total pool of glutathione                                   | S40,S41 | a         |
| $k_{\text{grx}_m}$             | $3.6 \times 10^{-4}$ | $\text{mM s}^{-1}$              | Rate constant of mitochondrial matrix glutaredoxin reaction | S36     | Adjusted  |

|                    |                       |                    |                                                                                    |         |          |
|--------------------|-----------------------|--------------------|------------------------------------------------------------------------------------|---------|----------|
| $k_{grx_i}$        | $3.6 \times 10^{-4}$  | mM s <sup>-1</sup> | Rate constant of extra-matrix glutaredoxin reaction                                | S37     | Adjusted |
| $K_{eq}^{GRX}$     | $1.37 \times 10^{-3}$ | mM <sup>-1</sup>   | Equilibrium constant of glutaredoxin                                               | S36,S37 |          |
| $K_m^{Grx}$        | 0.01                  | mM                 | Michaelis constant for GSH of GRX                                                  | S36,S37 |          |
| $K_m^{PSSG}$       | 0.0005                | mM                 | Michaelis constant for glutathionylated protein of glutaredoxin                    | S36,S37 |          |
| $k_{PSH}^1$        | 0.64                  | ms <sup>-1</sup>   | Rate constant of protein glutathionylation                                         | S38,S39 |          |
| $E_T^{PSH}$        | $8 \times 10^{-4}$    | mM                 | Concentration of proteins that can become glutathionylated                         | S38,S39 |          |
| $K_M^{GSH}$        | 0.75                  | mM                 | Michaelis constant of GSH for glutathionylation                                    | S38,S39 |          |
| $K_{act}^{H2O2}$   | $1 \times 10^{-3}$    | mM                 | Activation constant of H <sub>2</sub> O <sub>2</sub> for protein glutathionylation | S38,S39 |          |
| $GrxT$             | 0.002                 | mM                 | Glutaredoxin concentration                                                         | S38,S39 |          |
| $c_{GST}$          | $1.5 \times 10^{-8}$  | ms <sup>-1</sup>   | Rate constant of glutathione transporter                                           | S42     |          |
| $k_{0.5}^{GST}$    | 2.6                   | mM                 | transport association constant of GSH                                              | S42     |          |
| $E_T^{Prx3m}$      | T. 1                  | mM                 | Mitochondrial matrix concentration of Trx peroxidase (Prx)                         | S43     | Adjusted |
| $E_T^{Prx3i}$      | T. 1                  | mM                 | Extra-matrix concentration Prx                                                     | S44     | Adjusted |
| $\Phi_{1Prx}$      | 3.83                  | mM ms              | Constant for TxPX activity                                                         | S43,S44 | b        |
| $\Phi_{2Prx}$      | 1.85                  | mM ms              | Constant for TxPX activity                                                         | S43,S44 | b        |
| $E_T^{TrxR2m}$     | T. 1                  | mM                 | Mitochondrial matrix concentration of TrxR2                                        | S45     |          |
| $E_T^{TrxRi}$      | T. 1                  | mM                 | Extra-matrix concentration of TrxR                                                 | S46     |          |
| $K_M^{TrxSS}$      | 0.035                 | mM                 | Michaelis constant for oxidized Trx [Trx(SS)] of TrxR                              | S45,S46 | d,e      |
| $K_{Mtrx}^{NADPH}$ | 0.012                 | mM                 | Michaelis constant for NADPH of Trx                                                | S45,S46 | d,e      |

|                     |                       |                                |                                                |         |     |
|---------------------|-----------------------|--------------------------------|------------------------------------------------|---------|-----|
|                     | $22.7 \times 10^{-3}$ | $\text{ms}^{-1}$               | Rate constant of TrxR                          | S45,S46 | d,e |
| $k_{\text{TrxR}}^1$ |                       |                                |                                                |         |     |
| $\text{TrxT}_m$     | 0.025                 | mM                             | Total pool of mitochondrial matrix thioredoxin | S47     | c   |
|                     | 0.05                  | mM                             | Total pool of extra-matrix thioredoxin         | S48     |     |
| $\text{TrxT}_i$     |                       |                                |                                                |         |     |
| $k_{\text{CAT}}^1$  | 17                    | $\text{mM}^{-1}\text{ms}^{-1}$ | Rate constant of catalase (CAT)                | S49     |     |
| $E_{\text{CAT}}^T$  | $1.0 \times 10^{-6}$  | mM                             | Extra-matrix concentration of CAT              | S49     |     |
| $fr$                | $5.0 \times 10^{-2}$  | $\text{mM}^{-1}$               | Hydrogen peroxide inhibition factor of CAT     | S49     |     |

(a) (3); (b) (10); (c) (9); (d) (11); (e) (12); (f) (13).

## Section S8. Mitochondrial NADPH handling

In this section we will provide a detailed description of the mitochondrial NADPH handling.

$$NADP_m = C_{NADP_m} - [NADPH]_m \quad (\text{S50})$$

$$V_{\text{IDP}_{\text{NADP}}} = \left( 1 + \frac{[H^+]_m}{k_{m_{\text{IDP}}}^{H^+}} \right) \left( \begin{array}{l} 1 + \frac{[ISOC]}{k_{m_{\text{IDP}}}^{ISOC}} + \frac{NADP_m}{k_{m_{\text{IDP}}}^{NADP}} \left( 1 + \frac{k_{i_{\text{IDP}}}^{NADP}}{NADP_m} \right) + \frac{[aKG]}{k_{m_{\text{IDP}}}^{aKG}} + \frac{[NADPH]_m}{k_{m_{\text{IDP}}}^{NADPH}} + \dots \\ \dots \frac{[ISOC]}{k_{m_{\text{IDP}}}^{ISOC}} \frac{NADP_m}{k_{m_{\text{IDP}}}^{NADP}} \left( 1 + \frac{k_{i_{\text{IDP}}}^{NADP}}{NADP_m} \right) + \frac{[aKG]}{k_{m_{\text{IDP}}}^{aKG}} \frac{[NADPH]_m}{k_{m_{\text{IDP}}}^{NADPH}} + \dots \\ \dots \frac{[ISOC]}{k_{m_{\text{IDP}}}^{ISOC}} \frac{[NADPH]_m}{k_{m_{\text{IDP}}}^{NADPH}} + \frac{[aKG]}{k_{m_{\text{IDP}}}^{aKG}} \frac{NADP_m}{k_{m_{\text{IDP}}}^{NADP}} \left( 1 + \frac{k_{i_{\text{IDP}}}^{NADP}}{NADP_m} \right) \end{array} \right) \quad (\text{S51})$$

$$V_{\text{IDH}_{\text{NADP}}} = \frac{V_f^{\text{IDH}} \frac{k [ISOC]}{k_{m_{\text{IDP}}}^{ISOC}} \frac{NADP_m}{k_{m_{\text{IDP}}}^{NADP}} \left( 1 + \frac{k_{i_{\text{IDP}}}^{NADP}}{VNADH_m} \right) - V_b^{\text{IDH}} \frac{[aKG]}{k_{m_{\text{IDP}}}^{aKG}} \frac{[NADP]_m}{k_{m_{\text{IDP}}}^{NADPH}}}{V_{\text{IDP}_{\text{NADP}}}} \quad (\text{S52})$$

$$\begin{aligned}
V_{THDen} = & 1 + \frac{[NADH_m]}{k_{m\_THD}^{NADHm}} + \frac{NAD}{k_{m\_THD}^{NAD}} + \frac{NADP_m}{k_{m\_THD}^{NADP}} + \frac{[NADPH_m]}{k_{m\_THD}^{NADPH}} + \frac{[NADH_m] NADP_m}{k_{m\_THD}^{NADHm} k_{m\_THD}^{NADP}} e^{(F/10RT) \cdot \Delta\mu_H} + \\
& \frac{[NADPH_m] [NADH_m]}{k_{m\_THD}^{NADPH} k_{m\_THD}^{NADHm}} e^{(1-(F/10RT) \cdot \Delta\mu_H)} + \frac{NAD}{k_{m\_THD}^{NAD}} \frac{NADP_m}{k_{m\_THD}^{NADP}} e^{(F/10RT) \cdot \Delta\mu_H} e^{(1-(F/10RT) \cdot \Delta\mu_H)} + \\
& \frac{[NADH_m] [NADPH_m]}{k_{m\_THD}^{NADHm} k_{m\_THD}^{NADPH}}
\end{aligned} \tag{S53}$$

$$V_{THD} = \frac{E_T^{THD} \cdot k_a^{THD} \frac{[NADH]_m}{k_{m\_THD}^{NADHm}} \frac{NADP_m}{k_{m\_THD}^{NADP}} e^{(F/10RT) \cdot \Delta\mu_H} - E_T^{THD} \cdot k_b^{THD} \frac{NAD}{k_{m\_THD}^{NAD}} \frac{[NADPH_m]}{k_{m\_THD}^{NADPH}} e^{(1-(F/10RT) \cdot \Delta\mu_H)}}{V_{THDen}} \tag{S54}$$

**Table S3. Parameter values used in the simulations: Mitochondrial NADPH handling**

| Symbol                   | Value                 | Units               | Description                                            | Eq.     | Reference |
|--------------------------|-----------------------|---------------------|--------------------------------------------------------|---------|-----------|
| $C_{NADPm}$              | 0.1                   | mM                  | Sum of NADPH plus NADP <sup>+</sup>                    | S50     |           |
| $k_{m\_IDP}^{H+}$        | 0.5                   | mM                  | Dissociation constant for H <sup>+</sup> of IDH2       | S51     |           |
| $k_{m\_IDP}^{ISOC}$      | $3.9 \times 10^{-3}$  | mM                  | Michaelis constant for ISOC in IDH2                    | S51,S52 |           |
| $k_{m\_IDP}^{NADP}$      | $6.7 \times 10^{-3}$  | mM                  | Michaelis constant for NADP in IDH2                    | S51,S52 |           |
| $k_{i\_IDP}^{NADP}$      | $2 \times 10^{-6}$    | mM                  | Inhibition constant for NADP in IDH2                   | S51,S52 |           |
| $k_{m\_IDP}^{NADPH}$     | $1.2 \times 10^{-2}$  | mM                  | Michaelis constant for NADPH in IDH2                   | S51,S52 |           |
| $k_{m\_IDP}^{\alpha KG}$ | 0.51                  | mM                  | Michaelis constant for $\alpha$ KG in IDH2             | S51,S52 |           |
| $V_f^{IDH}$              | $8.7 \times 10^{-5}$  | mM ms <sup>-1</sup> | Maximal rate of IDH2 in the forward direction          | S52     |           |
| $V_{fb}^{IDH}$           | $5.45 \times 10^{-6}$ | mM ms <sup>-1</sup> | Maximal rate of IDH2 in the reverse direction          | S52     |           |
| $k_{m\_THD}^{NADPH}$     | 0.02                  | mM                  | Michaelis constant for NADPH in transhydrogenase (THD) | S53,S54 |           |
| $k_{m\_THD}^{NADHm}$     | 0.01                  | mM                  | Michaelis constant for NADH in THD                     | S53,S54 |           |
| $k_{m\_THD}^{NAD}$       | 0.125                 | mM                  | Michaelis constant for NAD in THD                      | S53,S54 |           |



|                     |                        |                  |                                    |         |
|---------------------|------------------------|------------------|------------------------------------|---------|
| $k_{m\_THD}^{NADP}$ | 0.017                  | mM               | Michaelis constant for NADP in THD | S53,S54 |
| $E_T^{THD}$         | $1.187 \times 10^{-5}$ | mM               | Concentration of THD enzyme        | S54     |
| $k_a^{THD}$         | 1.17474                | ms <sup>-1</sup> | Forward catalytic constant of THD  | S54     |
| $k_b^{THD}$         | 10                     | ms <sup>-1</sup> | Reverse catalytic constant of THD  | S54     |

## Section S9. Mitochondrial Model of Energy Metabolism and ion dynamics

The detailed explanation of the mathematical expressions and parameters of the model were previously presented in Wei et al. (2011).

### 9.1. Computational modeling of Na<sup>+</sup>/H<sup>+</sup> exchanger (NHE) and phosphate carrier (PiC)

$$J_{NHE} = c_{NHE} \frac{\beta_1^+ \beta_2^+ - \beta_1^- \beta_2^-}{\beta_1^+ + \beta_1^- + \beta_2^+ + \beta_2^-} \frac{1}{1 + 10^{n_i(pH_i - pK_i)}}$$

where

$$\beta_1^+ = \frac{k_1^+ K_{H\_NHE} [Na^+]_m}{K_{H\_NHE} [Na^+]_m + K_{H\_NHE} K_{Na\_NHE} + K_{Na\_NHE} [H^+]_m}$$

$$\beta_2^+ = \frac{k_4^+ K_{Na\_NHE} [H^+]_i}{K_{H\_NHE} [Na^+]_i + K_{H\_NHE} K_{Na\_NHE} + K_{Na\_NHE} [H^+]_i}$$

$$\beta_1^- = \frac{k_1^- K_{H\_NHE} [Na^+]_i}{K_{H\_NHE} [Na^+]_i + K_{H\_NHE} K_{Na\_NHE} + K_{Na\_NHE} [H^+]_i}$$

$$\beta_2^- = \frac{k_4^- K_{Na\_NHE} [H^+]_m}{K_{H\_NHE} [Na^+]_m + K_{H\_NHE} K_{Na\_NHE} + K_{Na\_NHE} [H^+]_m}$$

$$J_{PiC} = c_{PiC} \left( \frac{V_{PiC,f} \frac{[H_2PO_4^{2-}]_i [OH^-]_m}{K_{Pi,i} K_{OH,m}} - V_{PiC,b} \frac{[H_2PO_4^{2-}]_m [OH^-]_i}{K_{Pi,m} K_{OH,i}}}{1 + \frac{[H_2PO_4^{2-}]_i}{K_{Pi,i}} + \frac{[OH^-]_m}{K_{OH,m}} + \frac{[H_2PO_4^{2-}]_m}{K_{Pi,m}} + \frac{[OH^-]_i}{K_{OH,i}} + \frac{[H_2PO_4^{2-}]_m [OH^-]_i}{K_{Pi,m} K_{OH,i}} + \frac{[H_2PO_4^{2-}]_i [OH^-]_m}{K_{Pi,i} K_{OH,m}}} \right)$$

**Table S4. Parameter values for the mitochondrial Na<sup>+</sup>/H<sup>+</sup> proton exchanger and phosphate carrier**

| Symbol              | Value                     | Units                                           | Description                                    |
|---------------------|---------------------------|-------------------------------------------------|------------------------------------------------|
| $k_1^+$             | 0.0252                    | ms <sup>-1</sup>                                | NHE forward rate constant                      |
| $k_1^-$             | 0.0429                    | ms <sup>-1</sup>                                | NHE backward rate constant                     |
| $k_4^+$             | 0.16                      | ms <sup>-1</sup>                                | NHE forward rate constant                      |
| $k_4^-$             | 0.0939                    | ms <sup>-1</sup>                                | NHE backward rate constant                     |
| $K_{Na\_NHE}$       | 24                        | mM                                              | Na+Dissociation constant                       |
| $K_{H\_NHE}$        | $1.585 \times 10^{-4}$    | mM                                              | H+Dissociation constant                        |
| pK <sub>i</sub>     | 8.52                      |                                                 | Proton inhibitory constant                     |
| n <sub>i\_NHE</sub> | 3                         |                                                 | Hill coefficient for H+ binding                |
| $C_{NHE}$           | 0.00785<br>(mitochondria) | mM                                              | NHE concentration                              |
| $K_{Pi,i}$          | 11.06                     | mM                                              | Extra-matrix Pi binding constant               |
| $K_{Pi,m}$          | 11.06                     | mM                                              | Mitochondrial matrix Pi binding constant       |
| $K_{OH,i}$          | $4.08 \times 10^{-5}$     | mM                                              | Extra-matrix OH- binding constant              |
| $K_{OH,m}$          | $4.08 \times 10^{-5}$     | mM                                              | Mitochondrial matrix OH- binding constant      |
| $V_{PIC,f}$         | 90                        | μmol min <sup>-1</sup> mg protein <sup>-1</sup> | Forward V <sub>max</sub> of phosphate carrier  |
| $V_{PIC,b}$         | 90                        | μmol min <sup>-1</sup> mg protein <sup>-1</sup> | Backward V <sub>max</sub> of phosphate carrier |
| $C_{PiC}$           | 1.6915<br>(mitochondria)  | mg protein ml <sup>-1</sup>                     | PiC concentration                              |

## 9.2. TCA cycle rate equations

---


$$V_{CS} = \frac{k_{cat}^{CS} E_T^{CS}}{\left(1 + \frac{K_M^{AcCoA}}{[AcCoA]}\right) \left(1 + \frac{K_M^{OAA}}{[OAA]}\right)}$$


---

$$V_{ACO} = k_f^{ACO} \left( [CIT] - \frac{[ISOC]}{K_E^{ACO}} \right)$$


---

$$V_{IDH} = k_{cat}^{IDH} E_T^{IDH} \left[ \left( 1 + \frac{[H^+]_m}{k_{h,1}} + \frac{k_{h,2}}{[H^+]_m} \right) + f_i^{IDH} \left( \frac{K_{Midh}^{NAD}}{[NAD]} \right) + \dots \right]^{-1}$$

$$\left[ f_a^{IDH} \left( \frac{K_M^{ISOC}}{[ISOC]} \right)^{ni} + f_a^{IDH} f_i^{IDH} \left( \frac{K_M^{ISOC}}{[ISOC]} \right)^{ni} \left( \frac{K_{Midh}^{NAD}}{[NAD]} \right) \right]$$

$$f_a^{IDH} = \left[ \left( 1 + \frac{[ADP^{3-}]_m}{K_{ADP}^a} \right) \left( 1 + \frac{[Ca^{2+}]_m}{K_{Ca}^a} \right) \right]^{-1}$$

$$f_i^{IDH} = \left( 1 + \frac{[NADH]}{K_{i,NADH}} \right)$$


---

$$V_{KGDH} = \frac{k_{cat}^{KGDH} E_T^{KGDH}}{1 + \frac{[H^+]_m}{k_{h,1a}} + \frac{k_{h,2a}}{[H^+]_m} + f_a^{KGDH} \left( \frac{k_M^{\alpha KG}}{[\alpha KG]} \right)^{n_{\alpha KG}} + f_a^{KGDH} \frac{k_M^{NAD}}{[NAD]}}$$

$$f_a^{KGDH} = \left[ \left( 1 + \frac{[Mg^{2+}]}{K_D^{Mg^{2+}}} \right) \left( 1 + \frac{[Ca^{2+}]_m}{K_D^{Ca^{2+}}} \right) \right]^{-1}$$


---

$$V_{SL} = k_f^{SL} \left( [SCoA][ADP]_m [Pi]_m - \frac{[Suc][ATP]_m [CoA]}{K_{E,app}^{SL}} \right)$$

$$K_{E,app}^{SL} = K_{Eq}^{SL} \frac{P_{SUC} P_{ATP}}{P_{Pi} P_{ADP}}$$


---

Succinate dehydrogenase is included in the Table comprising the respiratory complexes

---

$$V_{FH} = k_f^{FH} \left( [FUM] - \frac{[MAL]}{K_E^{FH}} \right)$$

$$V_{MDH} = \frac{k_{cat}^{MDH} E_T^{MDH} f_{h,a} f_{h,i}}{1 + \frac{K_M^{MAL}}{[MAL]} \left( 1 + \frac{[OAA]}{K_i^{OAA}} \right) + \frac{K_M^{NAD}}{[NAD]} + \frac{K_M^{MAL}}{[MAL]} \left( 1 + \frac{[OAA]}{K_i^{OAA}} \right) \frac{K_M^{NAD}}{[NAD]}}$$

$$f_{h,a} = \left( 1 + \frac{[H^+]}{k_{h1}} + \frac{[H^+]^2}{k_{h1}k_{h2}} \right)^{-1} + k_{offset}$$

$$f_{h,i} = \left( 1 + \frac{k_{h3}}{[H^+]} + \frac{k_{h3}k_{h4}}{[H^+]^2} \right)$$

$$V_{AAT} = k_f^{AAT} [OAA][GLU] \frac{k_{ASP} K_E^{ATT}}{\left( k_{ASP} K_E^{AAT} + [\alpha KG] k_f^{AAT} \right)}$$

**Table S5. Parameter values used in the simulations: Tricarboxylic acid cycle**

| Symbol          | Value                  | Units     | Description                    |
|-----------------|------------------------|-----------|--------------------------------|
| [AcCoA]         | $1 \times 10^{-6}$     | mM        | Acetyl CoA concentration       |
| $k_{cat}^{CS}$  | $7.841 \times 10^{-6}$ | $ms^{-1}$ | Catalytic constant of CS       |
| $E_T^{CS}$      | 0.4                    | mM        | Concentration of CS            |
| $K_M^{AcCoA}$   | 0.0126                 | mM        | Michaelis constant for AcCoA   |
| $K_M^{OAA}$     | $6.4 \times 10^{-4}$   | mM        | Michaelis constant for OAA     |
| $C_{k_{int}}$   | 1.3                    | mM        | Sum of TCA cycle intermediates |
| $k_f^{ACO}$     | $3.896 \times 10^{-6}$ | $ms^{-1}$ | Forward rate constant of ACO   |
| $K_E^{ACO}$     | 2.22                   |           | Equilibrium constant of ACO    |
| $K_{i,NADH}$    | 0.19                   | mM        | Inhibition constant by NADH    |
| $k_{cat}^{IDH}$ | 0.0264                 | $ms^{-1}$ | Rate constant of IDH           |

|                     |                       |                  |                                           |
|---------------------|-----------------------|------------------|-------------------------------------------|
| $E_T^{IDH}$         | 0.109                 | mM               | Concentration of IDH                      |
| $k_{h,1}$           | $1 \times 10^{-5}$    | mM               | Ionization constant of IDH                |
| $k_{h,2}$           | $9 \times 10^{-4}$    | mM               | Ionization constant of IDH                |
| $K_M^{ISOC}$        | 1.52                  | mM               | Michaelis constant for isocitrate         |
| $n_i$               | 2.0                   |                  | Cooperativity for isocitrate              |
| $K_{Midh}^{NAD}$    | 0.923                 | mM               | Michaelis constant for $NAD^+$            |
| $K_{ADP}^a$         | 0.62                  | mM               | Activation constant by ADP                |
| $K_{Ca}^a$          | $5 \times 10^{-4}$    | mM               | IDH activation constant for $Ca^{2+}$     |
| $E_T^{KGDH}$        | 0.5                   | mM               | Concentration of KGDH                     |
| $k_{cat}^{KGDH}$    | $8.83 \times 10^{-4}$ | $ms^{-1}$        | Rate constant of KGDH                     |
| $k_M^{\alpha KG}$   | 30                    | mM               | Michaelis constant for $\alpha KG$        |
| $K_{M\_kgdh}^{NAD}$ | 38.7                  | mM               | Michaelis constant for $NAD^+$ of KGDH    |
| $k_{h,1a}$          | $4 \times 10^{-5}$    | mM               | Ionization constant of KGDH               |
| $k_{h,2a}$          | $7 \times 10^{-5}$    | mM               | Ionization constant of KGDH               |
| $K_D^{Mg^{2+}}$     | 0.0308                | mM               | Activation constant for $Mg^{2+}$         |
| $K_D^{Ca^{2+}}$     | $1.5 \times 10^{-4}$  | mM               | Activation constant for $Ca^{2+}$         |
| $n_{\alpha KG}$     | 1.2                   |                  | Hill coefficient of KGDH for $\alpha KG$  |
| $[Mg^{2+}]_m$       | 0.4                   | mM               | $Mg^{2+}$ concentration in mitochondria   |
| $[Mg^{2+}]_i$       | 1.0                   | mM               | $Mg^{2+}$ concentration in cytosol/buffer |
| $k_f^{SL}$          | $1.4 \times 10^{-3}$  | $mM^{-1}ms^{-1}$ | Forward rate constant of SL               |
| $K_E^{SL}$          | 3.115                 |                  | Equilibrium constant of the SL reaction   |

|                 |                            |                  |                                        |
|-----------------|----------------------------|------------------|----------------------------------------|
| [CoA]           | 0.02                       | mM               | Coenzyme A concentrations.             |
| $k_f^{FH}$      | $4.15 \times 10^{-4}$      | $\text{ms}^{-1}$ | Forward rate constant for FH.          |
| $K_E^{FH}$      | 1.0                        |                  | Equilibrium constant of FH             |
| $k_{h1}$        | $1.131 \times 10^{-5}$     | mM               | Ionization constant of MDH             |
| $k_{h2}$        | 26.7                       | mM               | Ionization constant of MDH             |
| $k_{h3}$        | $6.68 \times 10^{-9}$      | mM               | Ionization constant of MDH             |
| $k_{h4}$        | $5.62 \times 10^{-6}$      | mM               | Ionization constant of MDH             |
| $k_{offset}$    | $3.99 \times 10^{-2}$      |                  | Offset of MDH pH activation factor     |
| $k_{cat}^{MDH}$ | $6.21 \times 10^{-3}$      | $\text{ms}^{-1}$ | Rate constant of MDH                   |
| $E_T^{MDH}$     | 0.154                      | mM               | Total MDH enzyme concentration         |
| $K_M^{MAL}$     | 1.493                      | mM               | Michaelis constant for malate          |
| $K_i^{OAA}$     | 0.031                      | mM               | Inhibition constant for oxalacetate    |
| $K_M^{NAD}$     | 0.2244                     | mM               | Michaelis constant for $\text{NAD}^+$  |
| [GLU]           | $1 \times 10^{-4} \sim 30$ | mM               | Glutamate concentration.               |
| $k_f^{AAT}$     | $1.07 \times 10^{-3}$      | $\text{ms}^{-1}$ | Forward rate constant of AAT           |
| $K_E^{AAT}$     | 6.6                        |                  | Equilibrium constant of AAT            |
| $k_{ASP}$       | $1.5 \times 10^{-6}$       | $\text{ms}^{-1}$ | Rate constant of aspartate consumption |

### 9.3. Oxidative Phosphorylation rate equations

$$V_{O_2} = 0.5 \rho^{res} \frac{\left( r_a + r_{c1} e^{\left( \frac{6F\Delta\Psi_B}{RT} \right)} \right) e^{\left( \frac{FA_{res}}{RT} \right)} - r_a e^{\left( \frac{g6F\Delta\mu_H}{RT} \right)} + r_{c2} e^{\left( \frac{FA_{res}}{RT} \right)} e^{\left( \frac{g6F\Delta\mu_H}{RT} \right)}}{\left( 1 + r_1 e^{\left( \frac{FA_{res}}{RT} \right)} \right) e^{\left( \frac{6F\Delta\Psi_B}{RT} \right)} + \left( r_2 + r_3 e^{\left( \frac{FA_{res}}{RT} \right)} \right) e^{\left( \frac{g6F\Delta\mu_H}{RT} \right)}}$$

---


$$V_{He} = 6\rho^{res} \frac{\left( r_a e^{\left(\frac{A_{res}F}{RT}\right)} - (r_a + r_b) e^{\left(\frac{g6F\Delta\mu_H}{RT}\right)} \right)}{\left( 1 + r_1 e^{\left(\frac{FA_{res}}{RT}\right)} \right) e^{\left(\frac{6F\Delta\Psi_B}{RT}\right)} + \left( r_2 + r_3 e^{\left(\frac{FA_{res}}{RT}\right)} \right) e^{\left(\frac{g6F\Delta\mu_H}{RT}\right)}}$$

$$A_{res} = \frac{RT}{F} \ln \left( K_{res} \sqrt{\frac{[NADH]}{[NAD^+]}} \right)$$

---


$$V_{O_2SDH} = 0.5\rho^{res(SDH)} \frac{\left( r_a + r_{c1} e^{\left(\frac{4F\Delta\Psi_B}{RT}\right)} \right) e^{\left(\frac{FA_{RSDH}}{RT}\right)} - r_a e^{\left(\frac{g4F\Delta\mu_H}{RT}\right)} + r_{c2} e^{\left(\frac{FA_{RSDH}}{RT}\right)} e^{\left(\frac{g4F\Delta\mu_H}{RT}\right)} \left( \frac{1}{1 + \frac{[OAA]}{K_i^{OAA}}} \right)}{\left( 1 + r_1 e^{\left(\frac{FA_{RSDH}}{RT}\right)} \right) e^{\left(\frac{4F\Delta\Psi_B}{RT}\right)} + \left( r_2 + r_3 e^{\left(\frac{FA_{RSDH}}{RT}\right)} \right) e^{\left(\frac{g4F\Delta\mu_H}{RT}\right)}}$$

$$V_{He(SDH)} = 4\rho^{res(SDH)} \frac{\left( r_a e^{\left(\frac{A_{RSDH}F}{RT}\right)} - (r_a + r_b) e^{\left(\frac{g4F\Delta\mu_H}{RT}\right)} \right) \left( \frac{1}{1 + \frac{[OAA]}{K_i^{OAA}}} \right)}{\left( 1 + r_1 e^{\left(\frac{FA_{RSDH}}{RT}\right)} \right) e^{\left(\frac{4F\Delta\Psi_B}{RT}\right)} + \left( r_2 + r_3 e^{\left(\frac{FA_{RSDH}}{RT}\right)} \right) e^{\left(\frac{g4F\Delta\mu_H}{RT}\right)}}$$

$$A_{RSDH} = \frac{RT}{F} \ln \left( K_{RSDH,app} \sqrt{\frac{[SUC]}{[FUM]}} \right)$$

$$K_{RSDH,app} = \frac{K_{res(SDH)}}{P_{SUC}}$$

---


$$V_{ATPase} = -\rho^{F1} \frac{\left( 100p_a + p_{c1} \exp(3F\Delta\Psi_B / RT) \right) \exp(A_{F1}F / RT) - \left( p_a \exp(3F\Delta\mu_H / RT) \right)}{\left( 1 + p_1 \exp(A_{F1}F / RT) \right) \exp(3F\Delta\Psi_B / RT) + \left( p_2 + p_3 \exp(A_{F1}F / RT) \right) \exp(3F\Delta\mu_H / RT)}$$

$$V_{Hu} = -3\rho^{F1} \frac{p_a \left( 1 + \exp(A_{F1}F / RT) \right) - (p_a + p_b) \exp(3F\Delta\mu_H / RT)}{\left( 1 + p_1 \exp(A_{F1}F / RT) \right) \exp(3F\Delta\Psi_B / RT) + \left( p_2 + p_3 \exp(A_{F1}F / RT) \right) \exp(3F\Delta\mu_H / RT)}$$

$$A_{F1} = \frac{RT}{F} \ln \left( K_{app}^{ATPase} \frac{[MgATP^{2-}]}{[ADP_{free}][Pi_{total}]} \right)$$


---

$$K_{app}^{ATPase} = K_{eq}^{ATPase} [H^+] \frac{P_{ATP} P_{H_2O}}{P_{ADP} P_{Pi}}$$

**Table S6. Parameter values used in the simulations: Oxidative phosphorylation**

| Symbol            | Value                   | Units     | Description                                                          |
|-------------------|-------------------------|-----------|----------------------------------------------------------------------|
| $r_a$             | $6.394 \times 10^{-13}$ | $ms^{-1}$ | Sum of products of rate constants                                    |
| $r_b$             | $1.762 \times 10^{-16}$ | $ms^{-1}$ | Sum of products of rate constants                                    |
| $r_{c1}$          | $2.656 \times 10^{-22}$ | $ms^{-1}$ | Sum of products of rate constants                                    |
| $r_{c2}$          | $8.632 \times 10^{-30}$ | $ms^{-1}$ | Sum of products of rate constants                                    |
| $r_1$             | $2.077 \times 10^{-18}$ |           | Sum of products of rate constants                                    |
| $r_2$             | $1.728 \times 10^{-9}$  |           | Sum of products of rate constants                                    |
| $r_3$             | $1.059 \times 10^{-26}$ |           | Sum of products of rate constants                                    |
| $\rho^{res}$      | T.1                     | mM        | Concentration of electron carriers (respiratory complexes I-III-IV)  |
| $K_{res}$         | $1.35 \times 10^{18}$   |           | Equilibrium constant of respiration                                  |
| $\rho^{res(SDH)}$ | T.1                     | mM        | Concentration of electron carriers (respiratory complexes II-III-IV) |
| $\Delta\Psi_B$    | 50                      | mV        | Phase boundary potential                                             |
| $g$               | 0.85                    |           | Correction factor for voltage                                        |
| $K_I^{OAA}$       | 0.15                    |           | Inhibition constant for OAA                                          |
| $K_{res(SDH)}$    | $5.765 \times 10^{13}$  |           | Equilibrium constant of SDH                                          |
| $p_a$             | $1.656 \times 10^{-8}$  | $ms^{-1}$ | Sum of products of rate constants                                    |
| $p_b$             | $3.373 \times 10^{-10}$ | $ms^{-1}$ | Sum of products of rate constants                                    |
| $p_{c1}$          | $9.651 \times 10^{-17}$ | $ms^{-1}$ | Sum of products of rate constants                                    |
| $p_{c2}$          | $4.585 \times 10^{-17}$ | $ms^{-1}$ | Sum of products of rate constants                                    |



|                   |                        |                            |                                         |
|-------------------|------------------------|----------------------------|-----------------------------------------|
| $p_1$             | $1.346 \times 10^{-4}$ |                            | Sum of products of rate constants       |
| $p_2$             | $7.739 \times 10^{-7}$ |                            | Sum of products of rate constants       |
| $p_3$             | $6.65 \times 10^{-15}$ |                            | Sum of products of rate constants       |
| $\rho^{F_1}$      | T.1                    | mM                         | Concentration of $F_1F_0$ -ATPase       |
| $K_{eq}^{ATPase}$ | $1.71 \times 10^6$     |                            | Equilibrium constant of ATP synthesis   |
| $[Pi]_i$          | T.1                    | mM                         | Inorganic phosphate concentration       |
| $C_A$             | 1.5                    | mM                         | Total sum of adenine nucleotides        |
| $V_{maxANT}$      | T.1                    | mM $ms^{-1}$               | Maximal rate of the ANT                 |
| $h^{ANT}$         | 0.5                    |                            | Fraction of $\Delta\Psi_B$              |
| $g_H$             | T.1                    | mM $ms^{-1}$<br>mV $^{-1}$ | Ionic conductance of the inner membrane |
| $C_{PN}$          | 1.0                    | mM                         | Total sum of pyridine nucleotides       |
| $C_{mito}$        | $1.812 \times 10^{-3}$ | mM mV $^{-1}$              | Inner membrane capacitance              |

---

#### 9.4. Acid-base equilibria of adenine nucleotides and phosphate

Chemical species in the biochemical reactions exist in mixed ionic forms such as protonated, deprotonated or bound to different cations (14-17). In general, the total concentration of ligand is the sum of free ligand, ligand bound to proton and to metals (17).

$$[L_{total}] = [L] + \sum_{p=1}^{N_p} [LH_p] + \sum_{m=1}^{N_m} [LM^m]$$

where L is the ligand, H is the proton and  $M^m$  is the  $m^{\text{th}}$  metal ion. The second term on the right hand side of the eqn. refers to the sum of the protonated moieties, and the third term represents the sum of the metal-bound moieties. Therefore,  $N_p$  is the total number of protonation sites, and  $N_m$  is the total number of metal-binding sites in the ligand.

Here, only the most abundant and physiological significant forms of ATP, ADP, and phosphate in the pH range from 5.0 to 9.0 were considered:  $ATP^{4-}$ ,  $HATP^{3-}$ ,  $MgATP^-$ ,  $ADP^{3-}$ ,  $HADP^{2-}$ ,  $MgADP^-$ ,  $HPO_4^{2-}$ , and  $H_2PO_4^-$ .

---


$$[ATP^{4-}]_m = \frac{[ATP_{total}]_m}{\left(1 + \frac{[H^+]_m}{K_{a,ATP}} + \frac{[Mg^{2+}]_m}{K_{Mg,ATP}}\right)}$$

$$[HATP^{3-}]_m = \frac{[ATP^{4-}]_m [H^+]_m}{K_{a,ATP}}$$

$$[MgATP^{2-}]_m = \frac{[ATP^{4-}]_m [Mg^{2+}]_m}{K_{Mg,ATP}}$$

$$[ADP^{3-}]_m = \frac{[ADP_{total}]_m}{\left(1 + \frac{[H^+]_m}{K_{a,ADP}} + \frac{[Mg^{2+}]_m}{K_{Mg,ADP}}\right)}$$

$$[HADP^{2-}]_m = \frac{[ADP^{3-}]_m [H^+]_m}{K_{a,ADP}}$$

$$[MgADP^-]_m = \frac{[ADP^{3-}]_m [Mg^{2+}]_m}{K_{Mg,ADP}}$$

$$[H_2PO_4^-]_m = \frac{[Pi]_{total}}{1 + \frac{[H^+]_m}{K_{a,Pi}}}$$

$$[HPO_4^{2-}]_m = \frac{[H_2PO_4^-]_m K_{a,Pi}}{[H^+]_m}$$

---


$$[ATP^{4-}]_i = \frac{[ATP_{total}]_i}{\left(1 + \frac{[H^+]_i}{K_{a,ATP}} + \frac{[Mg^{2+}]_i}{K_{Mg,ATP}}\right)}$$

$$[ADP^{3-}]_i = \frac{[ADP_{total}]_i}{\left(1 + \frac{[H^+]_i}{K_{a,ADP}} + \frac{[Mg^{2+}]_i}{K_{Mg,ADP}}\right)}$$

$$[ATP_{total}] = [ATP^{4-}] + [HATP^{3-}] + [MgATP^-]$$

$$[ATP_{free}] = [ATP^{4-}] + [HATP^{3-}]$$

$$[ADP_{free}] = [ADP^{3-}] + [HADP^{2-}]$$

$$[Pi_{total}] = [H_2Pi^-] + [HPi^{2-}]$$


---

## 9.5. Polynomials for species undergoing acid-base equilibrium, ionic gradients, and conservation relations

$$P_{ATP} = 1 + \frac{[H^+]_m}{K_{a,ATP}} + \frac{[Mg^{2+}]_m}{K_{Mg,ATP}}$$

$$P_{ADP} = 1 + \frac{[H^+]_m}{K_{a,ADP}} + \frac{[Mg^{2+}]_m}{K_{Mg,ADP}}$$

$$P_{Pi} = 1 + \frac{[H^+]_m}{K_{a,Pi}}$$

$$P_{SUC} = 1 + \frac{[H^+]_m}{K_{a,SUC}}$$

$$P_{H_2O} = 1 + \frac{[H^+]_m}{K_{a,H_2O}}$$

$$\Delta\mu_H = -2.303 \frac{RT}{F} \Delta pH + \Delta\Psi_m$$

$$\Delta pH = pH_i - pH_m$$

$$\Delta\Psi_m = \Psi_i - \Psi_m$$

$$[NAD^+] = C_{PN} - [NADH]$$

$$[ATP_{total}] = C_A - [ADP_{total}]$$

## 9.6. Adenine Nucleotide translocator (ANT)

$$V_{ANT} = V_{\max ANT} \frac{\left(1 - \frac{[ATP^{4-}]_i \times [ADP^{3-}]_m}{[ADP^{3-}]_i \times [ATP^{4-}]_m}\right) \exp(-F\Delta\Psi_m / RT)}{\left(1 + \frac{[ATP^{4-}]_i}{[ADP^{3-}]_i} \exp(-hF\Delta\Psi / RT)\right) \left(1 + \frac{[ADP^{3-}]_m}{[ATP^{4-}]_m}\right)}$$

## 9.7. Ionic fluxes rate equations

---


$$V_{uni} = V_{max}^{wi} \frac{\frac{[Ca^{2+}]_i}{K_{trans}} \left(1 + \frac{[Ca^{2+}]_i}{K_{trans}}\right)^3 \frac{2F(\Delta\Psi_m - \Delta\Psi^\circ)}{RT}}{\left( \left(1 + \frac{[Ca^{2+}]_i}{K_{trans}}\right)^4 + \frac{L}{\left(1 + \frac{[Ca^{2+}]_i}{K_{act}}\right)^{n_a}} \right) \left(1 - e^{\left(\frac{-2F(\Delta\Psi_m - \Delta\Psi^\circ)}{RT}\right)}\right)}$$


---

$$V_{NaCa} = V_{max}^{NaCa} \frac{e^{\left(\frac{bF(\Delta\Psi_m - \Delta\Psi^\circ)}{RT}\right)} e^{\left(\ln \frac{[Ca^{2+}]_m}{[Ca^{2+}]_i}\right)}}{\left(1 + \frac{K_{Na}}{[Na^+]_i}\right)^n \left(1 + \frac{K_{Ca}}{[Ca^{2+}]_m}\right)}$$


---

$$J_{NHE} = c_{NHE} \frac{\frac{\beta_1^+ \beta_2^+ - \beta_1^- \beta_2^-}{\beta_1^+ + \beta_1^- + \beta_2^+ + \beta_2^-}}{1 + 10^{n_i(pH_i - pK_i)}}$$

$$\beta_1^+ = \frac{k_1^+ K_{H\_NHE} [Na^+]_m}{K_{H\_NHE} [Na^+]_m + K_{H\_NHE} K_{Na\_NHE} + K_{Na\_NHE} [H^+]_m}$$

$$\beta_2^+ = \frac{k_2^+ K_{Na\_NHE} [H^+]_i}{K_{H\_NHE} [Na^+]_i + K_{H\_NHE} K_{Na\_NHE} + K_{Na\_NHE} [H^+]_i}$$

$$\beta_1^- = \frac{k_1^- K_{H\_NHE} [Na^+]_i}{K_{H\_NHE} [Na^+]_i + K_{H\_NHE} K_{Na\_NHE} + K_{Na\_NHE} [H^+]_i}$$

$$\beta_2^- = \frac{k_2^- K_{Na\_NHE} [H^+]_m}{K_{H\_NHE} [Na^+]_m + K_{H\_NHE} K_{Na\_NHE} + K_{Na\_NHE} [H^+]_m}$$


---

$$J_{PIC} = c_{PIC} \frac{V_{PIC,f} \frac{[HPO_4^{2-}]_i [OH^-]_m}{K_{Pi,i} K_{OH,m}} - V_{PIC,b} \frac{[HPO_4^{2-}]_m [OH^-]_i}{K_{Pi,m} K_{OH,i}}}{\left(1 + \frac{[HPO_4^{2-}]_i}{K_{Pi,i}} + \frac{[OH^-]_m}{K_{OH,m}} + \frac{[HPO_4^{2-}]_m}{K_{Pi,m}} + \frac{[OH^-]_i}{K_{OH,i}} + \frac{[HPO_4^{2-}]_m [OH^-]_i}{K_{Pi,m} K_{OH,i}} + \frac{[HPO_4^{2-}]_i [OH^-]_m}{K_{Pi,i} K_{OH,m}}\right)}$$


---

$$V_{Hleak} = g_H \Delta\mu_H$$


---

## 9.8. pH regulation in the mitochondria

Apparent equilibrium constant is defined in terms of the species concentration at equilibrium and as a function of pH (17).

$$K' = [H^+]^n \frac{K_{\text{ref}} \prod P_{\text{product}}}{\prod P_{\text{reactant}}}$$

where n is proton stoichiometry of the reference reaction and P is the binding polynomial

$$(P = 1 + \sum_{p=1}^{N_p} \frac{[H]^p}{\prod_{l=1}^p K_{a,l}} + \sum_{m=1}^{N_m} \frac{[M^m]}{K_{M^m}}).$$

$K_{\text{ref}}$  is the equilibrium constant for the reference reaction

$$(K_{\text{ref}} = e^{-\Delta_i G^0/RT}).$$

## 9.9. pH-dependence of TCA cycle enzyme activities

$$V_{KGDH} = \frac{k_{\text{cat}}^{KGDH} k_T^{KGDH}}{1 + \frac{[H^+]_m}{k_{h,1a}} + \frac{k_{h,2a}}{[H^+]_m} + f_a^{KGDH} \left( \frac{k_M^{\alpha KG}}{[\alpha KG]} \right)^{n_{\alpha KG}} + f_a^{KGDH} \frac{k_M^{NAD}}{[NAD]}}$$

$$f_a^{KGDH} = \left[ \left( 1 + \frac{[Mg^{2+}]}{K_D^{Mg^{2+}}} \right) \left( 1 + \frac{[Ca^{2+}]_m}{K_D^{Ca^{2+}}} \right) \right]^{-1}$$

## 9.10. Parameter values used in the simulations of ion handling

**Table S7. Parameter values used in the simulations: Mitochondrial Ca<sup>2+</sup> handling**

| Symbol                        | Value                | Units               | Description                                           |
|-------------------------------|----------------------|---------------------|-------------------------------------------------------|
| $V_{\text{max}}^{\text{uni}}$ | T.1                  | mM ms <sup>-1</sup> | $V_{\text{max}}$ uniporter Ca <sup>2+</sup> transport |
| $\Delta\Psi^\circ$            | 91                   | mV                  | Offset membrane potential                             |
| $K_{\text{act}}$              | $3.8 \times 10^{-4}$ | mM                  | Activation constant                                   |
| $K_{\text{trans}}$            | 0.019                | mM                  | $K_d$ for translocated Ca <sup>2+</sup>               |

|                  |                       |                     |                                                                          |
|------------------|-----------------------|---------------------|--------------------------------------------------------------------------|
| $L$              | 110.0                 |                     | $K_{eq}$ for conformational transitions in uniporter                     |
| $n_a$            | 2.8                   |                     | Uniporter activation cooperativity                                       |
| $V_{max}^{NaCa}$ | T.1                   | mM ms <sup>-1</sup> | $V_{max}$ of Na <sup>+</sup> /Ca <sup>2+</sup> exchanger                 |
| $b$              | 0.5                   |                     | $\Delta\Psi_m$ dependence on Na <sup>+</sup> /Ca <sup>2+</sup> exchanger |
| $K_{Na}$         | 9.4                   | mM                  | Exchanger Na <sup>2+</sup> constant                                      |
| $K_{Ca}$         | 3.75×10 <sup>-4</sup> | mM                  | Exchanger Ca <sup>2+</sup> constant                                      |
| $n$              | 3.0                   |                     | Na <sup>+</sup> /Ca <sup>2+</sup> exchanger cooperativity                |
| $\delta_{Ca}$    | 3 × 10 <sup>-4</sup>  |                     | Fraction of free [Ca <sup>2+</sup> ] <sub>m</sub>                        |

**Table S8. Parameter values used in the simulations: Mitochondrial H<sup>+</sup> and Na<sup>+</sup> handling**

| Symbol        | Value                 | Units         | Description                                    |
|---------------|-----------------------|---------------|------------------------------------------------|
| $\delta_H$    | 1×10 <sup>-5*</sup>   | dimensionless | mitochondria H <sup>+</sup> buffering capacity |
| $K_{a,ADP}$   | 4.17×10 <sup>-7</sup> |               | ADP dissociation constant                      |
| $K_{a,ATP}$   | 3.31×10 <sup>-7</sup> |               | ATP dissociation constant                      |
| $K_{a,Pi}$    | 1.78×10 <sup>-7</sup> |               | Pi dissociation constant                       |
| $K_{Mg,ATP}$  | 6.46×10 <sup>-5</sup> |               | Mg <sup>2+</sup> ATP dissociation constant     |
| $K_{Mg,ADP}$  | 5.62×10 <sup>-4</sup> |               | Mg <sup>2+</sup> ADP dissociation constant     |
| $K_{a,SUC}$   | 6.3×10 <sup>-6</sup>  |               | Ka of succinate dissociation constant          |
| $K_{a,H_2O}$  | 1×10 <sup>-14</sup>   | M             | dissociation constant for water                |
| $[H^+]_i$     | 1×10 <sup>-4</sup>    | mM            | cytosolic H <sup>+</sup> concentration         |
| $[Na^+]_i$    | T.1                   | mM            | cytosolic Na <sup>+</sup> concentration        |
| $[Ca^{2+}]_i$ | 1×10 <sup>-4</sup>    | mM            | cytosolic Ca <sup>2+</sup> concentration       |
| $[ADP]_i$     | 0.01~1.0              | mM            | cytosolic ADP concentration                    |

\*from Nyguyen (18) and Vaughan-Jones (19)

## Section S10. ROS transport

$$V_{IMAC} = \left( a + \frac{b}{1 + \frac{K_{cc}}{[O_2^{\bullet-}]_i}} \right) \left( GL + \frac{G_{max}}{1 + e^{(K(\Delta\Psi_m^b) + \Delta\Psi_m)}} \right) \Delta\Psi_m$$

$$V_{ROS}^{Tr} = j \frac{V_{IMAC}}{\Delta\Psi_m} \left( -\Delta\Psi_m - \frac{RT}{F} \log \left( \frac{[O_2^{\bullet-}]_m}{[O_2^{\bullet-}]_i} \right) \right)$$

**Table S9. Parameter values used in the simulations: ROS transport**

| Symbol           | Value                   | Units         | Description                                         |
|------------------|-------------------------|---------------|-----------------------------------------------------|
| $a$              | $1 \times 10^{-3}$      | dimensionless | Basal IMAC conductance                              |
| $b$              | $1 \times 10^4$         | dimensionless | Activation factor by cytoplasmic $O_2^{\bullet-}$   |
| $K_{cc}$         | $1 \times 10^{-2}$      | mM            | Activation constant by cytoplasmic $O_2^{\bullet-}$ |
| GL               | $3.5 \times 10^{-8}$    |               | Integral conductance for IMAC                       |
| $G_{max}$        | $3.9085 \times 10^{-6}$ |               | Leak conductance of IMAC at saturation              |
| K                | $7.0 \times 10^{-2}$    | $mV^{-1}$     | Steepness factor                                    |
| $\Delta\Psi_m^b$ | 4                       | mV            | Potential at half saturation                        |
| j                | 0.1                     | dimensionless | Fraction of IMAC conductance                        |
| $\frac{RT}{F}$   | 26.730818               |               |                                                     |

### Section 11. State variables initial conditions

| Symbol                      | Value                  | Units | Description                            |
|-----------------------------|------------------------|-------|----------------------------------------|
| $[\text{Ca}^{2+}]_m$        | $2.738 \times 10^{-5}$ | mM    | Mitochondrial matrix $\text{Ca}^{2+}$  |
| $[\text{ADP}]_m$            | 0.0158                 | mM    | Mitochondrial matrix ADP               |
| $\Delta\Psi_m$              | 193.0                  | mV    | Mitochondrial membrane potential       |
| $[\text{NADH}]$             | 0.965                  | mM    | Mitochondrial matrix NADH              |
| $[\text{H}^+]_m$            | $6.97 \times 10^{-5}$  | mM    | Mitochondrial matrix $\text{H}^+$      |
| $[\text{Pi}]_m$             | 8.28                   | mM    | Mitochondrial matrix Pi                |
| $[\text{ISOC}]$             | 0.121                  | mM    | Isocitrate                             |
| $[\alpha\text{KG}]$         | 0.13                   | mM    | $\alpha$ -ketoglutarate                |
| $[\text{SCoA}]$             | 0.0161                 | mM    | Succinyl CoA                           |
| $[\text{Suc}]$              | 0.037                  | mM    | Succinate                              |
| $[\text{FUM}]$              | 0.235                  | mM    | Fumarate                               |
| $[\text{MAL}]$              | 0.228                  | mM    | Malate                                 |
| $[\text{OAA}]$              | 0.00128                | mM    | Oxalacetate                            |
| $[\text{Na}^+]_m$           | 0.0985                 | mM    | Mitochondrialmatrix $\text{Na}^+$      |
| $[\text{O}_2^{\bullet-}]_m$ | $6.39 \times 10^{-6}$  | mM    | Mitochondrial matrix Superoxide        |
| $[\text{O}_2^{\bullet-}]_i$ | $4.83 \times 10^{-8}$  | mM    | Extra-matrix Superoxide                |
| $[\text{H}_2\text{O}_2]_m$  | $8.23 \times 10^{-5}$  | mM    | Mitochondrial matrix Hydrogen peroxide |
| $[\text{H}_2\text{O}_2]_i$  | $2.83 \times 10^{-7}$  | mM    | Extra-matrix Hydrogen peroxide         |
| $[\text{GSH}]_m$            | 1.65                   | mM    | Mitochondrial matrix GSH               |
| $[\text{GSH}]_i$            | 1.65                   | mM    | Extra-matrix GSH                       |
| $[\text{GSSG}]_m$           | 1.32                   | mM    | Mitochondrial matrix GSSG              |



|                      |                       |    |                                         |
|----------------------|-----------------------|----|-----------------------------------------|
| $[\text{TrxSH}_2]_m$ | 0.0243                | mM | Mitochondrial matrix TrxSH <sub>2</sub> |
| $[\text{TrxSH}_2]_i$ | 0.0499                | mM | Extra-matrix TrxSH <sub>2</sub>         |
| $[\text{PSSG}]_m$    | $6.76 \times 10^{-4}$ | mM | Mitochondrial matrix PSSG               |
| $[\text{PSSG}]_i$    | $2.64 \times 10^{-5}$ | mM | Extra-matrix PSSG                       |

---

## Section S12. Glossary

| Symbol                 | Definition                                          |
|------------------------|-----------------------------------------------------|
| $J_H$                  | Flux of proton transport                            |
| $K_{ref}^k$            | Equilibrium constant of $k^{th}$ reference reaction |
| $K_{app}^k$            | Apparent equilibrium constant of $k^{th}$ reaction  |
| $\delta_H$             | Proton buffer capacity                              |
| $\delta_{Ca}$          | Calcium buffer capacity                             |
| $\alpha\text{KG}$      | $\alpha$ -ketoglutarate                             |
| ASP                    | Aspartate                                           |
| CIT                    | Citric acid                                         |
| $F_1F_0\text{-ATPase}$ | Mitochondrial $F_1F_0$ ATP synthase                 |
| FUM                    | Fumarate                                            |
| IDH                    | Isocitrate dehydrogenase                            |
| ISOC                   | Iscocitrate                                         |
| KGDH                   | $\alpha$ -ketoglutarate dehydrogenase               |
| MAL                    | Malate                                              |
| OAA                    | Oxalacetate                                         |
| SCoA                   | Succinyl CoA                                        |

|                      |                                                             |
|----------------------|-------------------------------------------------------------|
| Suc                  | Succinate                                                   |
| TCA                  | Tricarboxylic acid cycle                                    |
| $O_2^{\bullet -}$    | Superoxide                                                  |
| $H_2O_2$             | Hydrogen peroxide                                           |
| GSH                  | Reduced glutathione                                         |
| GSSG                 | Oxidized glutathione                                        |
| Trx(SH) <sub>2</sub> | Reduced thioredoxin                                         |
| TrxSS                | Oxidized thioredoxin                                        |
| PSSG                 | Glutathionylated proteins                                   |
| IDH2                 | Isocitrate dehydrogenase                                    |
| THD                  | Transhydrogenase                                            |
| $V_{AAT}$            | Rate of aspartate amino transferase                         |
| $V_{ACO}$            | Rate of aconitase                                           |
| $V_{ANT}$            | Rate of the adenine nucleotide transferase                  |
| $V_{ATP_{synthase}}$ | Rate of the $F_1F_0$ ATP synthase                           |
| $V_{CS}$             | Rate of the citrate synthase                                |
| $V_{FH}$             | Rate of the fumarate hydratase                              |
| $V_{He}$             | Rate of proton transport driven by complex I, III, and IV   |
| $V_{He(SDH)}$        | Rate of proton transport driven by complex II, III and IV   |
| $V_{Hleak}$          | Rate of proton leak across the inner mitochondrial membrane |
| $V_{Hu}$             | Rate of proton uptake via $F_1F_0$ ATP synthase             |
| $V_{IDH}$            | Rate of isocitrate dehydrogenase                            |

|                |                                                                              |
|----------------|------------------------------------------------------------------------------|
| $V_{KGDH}$     | Rate of $\alpha$ -ketoglutarate dehydrogenase                                |
| $V_{MDH}$      | Rate of malate dehydrogenase                                                 |
| $V_{NaCa}$     | Rate of the mitochondrial $Na^+/Ca^{2+}$ exchanger                           |
| $V_{NHE}$      | Rate of the mitochondrial $Na^+/H^+$ exchanger                               |
| $V_{O_2}$      | Oxygen consumption rate driven by complex I                                  |
| $V_{O_2SDH}$   | Oxygen consumption rate driven by complex II                                 |
| $V_{PIC}$      | Rate of the mitochondrial phosphate carrier                                  |
| $V_{SDH}$      | Rate of succinate dehydrogenase (complex II)                                 |
| $V_{SL}$       | Rate of succinate lyase                                                      |
| $V_{uni}$      | Rate of $Ca^{2+}$ uniporter in the mitochondrial inner membrane              |
| $V_{IMAC}$     | IMAC conductance                                                             |
| $V_{ROS}^{Tr}$ | Rate of transport of $O_2^{\cdot -}$ across the inner mitochondrial membrane |
| $V_{MnSOD}$    | Rate of mitochondrial matrix superoxide dismutase                            |
| $V_{CuZnSOD}$  | Rate of extra-matrix superoxide dismutase                                    |
| $V_{GPXm}$     | Rate of mitochondrial matrix glutathione peroxidase                          |
| $V_{GPXi}$     | Rate of extra-matrix glutathione peroxidase                                  |
| $V_{GRm}$      | Rate of mitochondrial matrix glutathione reductase                           |
| $V_{GRi}$      | Rate of extra-matrix glutathione reductase                                   |
| $V_{GRX_m}$    | Rate of mitochondrial matrix glutaredoxin                                    |
| $V_{GRX_i}$    | Rate of extra-matrix glutaredoxin                                            |
| $V_{GST}$      | Rate of extra-matrix GSSG transport                                          |

|                |                                                            |
|----------------|------------------------------------------------------------|
| $V_{TxPX_m}$   | Rate of mitochondrial matrix peroxiredoxin                 |
| $V_{TxPX_i}$   | Rate of extra-matrix peroxiredoxin                         |
| $V_{TxR_m}$    | Rate of mitochondrial matrix thioredoxin reductase         |
| $V_{TxR_i}$    | Rate of extra-matrix thioredoxin reductase                 |
| $V_{CAT}$      | Rate of catalase                                           |
| G/M            | Glutamate and malate                                       |
| DNP            | Dinitrophenol                                              |
| CN             | Cyanide                                                    |
| $\Delta\psi_m$ | Electric potential across the mitochondrial inner membrane |
| $\Delta p$     | Proton motive force                                        |
| $v_m$          | Volume of the mitochondrial matrix compartment             |
| $v_i$          | Volume of the extra-matrix compartment                     |

---

## References

1. Schafer, F. Q., and G. R. Buettner. 2001. Redox environment of the cell as viewed through the redox state of the glutathione disulfide/glutathione couple. *Free Radic Biol Med* 30:1191-1212.
2. Aon, M. A., S. Cortassa, E. Marban, and B. O'Rourke. 2003. Synchronized whole cell oscillations in mitochondrial metabolism triggered by a local release of reactive oxygen species in cardiac myocytes. *J Biol Chem* 278:44735-44744.
3. Cortassa, S., M. A. Aon, R. L. Winslow, and B. O'Rourke. 2004. A mitochondrial oscillator dependent on reactive oxygen species. *Biophys J* 87:2060-2073.
4. Manoli, I., S. Alesci, M. R. Blackman, Y. A. Su, O. M. Rennert, and G. P. Chrousos. 2007. Mitochondria as key components of the stress response. *Trends Endocrinol Metab* 18:190-198.
5. Nelson, D. L. 2008. *Lehninger principles of biochemistry*. W.H. Freeman, New York .:

6. Stanley, B. A., V. Sivakumaran, S. Shi, I. McDonald, D. Lloyd, W. H. Watson, M. A. Aon, and N. Paolocci. 2011. Thioredoxin reductase-2 is essential for keeping low levels of H<sub>2</sub>O<sub>2</sub> emission from isolated heart mitochondria. *J Biol Chem* 286:33669-33677.
7. Fernandes, A. P., and A. Holmgren. 2004. Glutaredoxins: glutathione-dependent redox enzymes with functions far beyond a simple thioredoxin backup system. *Antioxidants & redox signaling* 6:63-74.
8. Holmgren, A. 1989. Thioredoxin and glutaredoxin systems. *J Biol Chem* 264:13963-13966.
9. Cox, A. G., C. C. Winterbourn, and M. B. Hampton. 2010. Mitochondrial peroxiredoxin involvement in antioxidant defence and redox signalling. *Biochem J* 425:313-325.
10. Sztajer, H., B. Gamain, K. D. Aumann, C. Slomianny, K. Becker, R. Brigelius-Flohe, and L. Flohe. 2001. The putative glutathione peroxidase gene of *Plasmodium falciparum* codes for a thioredoxin peroxidase. *J Biol Chem* 276:7397-7403.
11. Pillay, C. S., J. H. Hofmeyr, B. G. Olivier, J. L. Snoep, and J. M. Rohwer. 2009. Enzymes or redox couples? The kinetics of thioredoxin and glutaredoxin reactions in a systems biology context. *Biochem J* 417:269-275.
12. Eckenroth, B., K. Harris, A. A. Turanov, V. N. Gladyshev, R. T. Raines, and R. J. Hondal. 2006. Semisynthesis and characterization of mammalian thioredoxin reductase. *Biochemistry* 45:5158-5170.
13. McAdam, M. E., F. Levelle, R. A. Fox, and E. M. Fielden. 1977. A pulse-radiolysis study of the manganese-containing superoxide dismutase from *Bacillus stearothermophilus*. *Biochem J* 165:81-87.
14. Alberty, R. A. 2003. *Thermodynamics of biochemical reactions*. Wiley-Interscience, Hoboken, N.J.
15. Kushmerick, M. J. 1997. Multiple equilibria of cations with metabolites in muscle bioenergetics. *Am J Physiol* 272:C1739-1747.
16. Alberty, R. A. 2006. *Biochemical Thermodynamics: Applications of Mathematica*.
17. Vinnakota, K., M. L. Kemp, and M. J. Kushmerick. 2006. Dynamics of muscle glycogenolysis modeled with pH time course computation and pH-dependent reaction equilibria and enzyme kinetics. *Biophysical journal* 91:1264-1287.
18. Nguyen, M. H., S. J. Dudycha, and M. S. Jafri. 2007. Effect of Ca<sup>2+</sup> on cardiac mitochondrial energy production is modulated by Na<sup>+</sup> and H<sup>+</sup> dynamics. *Am J Physiol Cell Physiol* 292:C2004-2020.
19. Vaughan-Jones, R. D., B. E. Peercy, J. P. Keener, and K. W. Spitzer. 2002. Intrinsic H<sup>(+)</sup> ion mobility in the rabbit ventricular myocyte. *J Physiol* 541:139-158.
